# Supplementary material for: Probucol mitigates high-fat diet-induced cognitive and social impairments by regulating brain redox and insulin resistance
Source: Frontiers journal article supplement (doi:10.3389/fnins.2024.1368552), 2024-04-23
Supplement: Image_1.pdf [file Image_1.pdf]

|                                       | Normal chow diet |        | High-fat diet |        |
|---------------------------------------|------------------|--------|---------------|--------|
|                                       | g %              | kcal % | g %           | kcal % |
| Protein                               | 19.2             | 20     | 26.2          | 20     |
| Carbohydrate                          | 67.3             | 70     | 26.3          | 20     |
| Fat                                   | 4.3              | 10     | 34.9          | 60     |
| Total                                 |                  |        |               | 100    |
| kcal/gram                             | 3.85             |        | 5.24          |        |
| Ingredient                            | gram             | kcal   | gram          | kcal   |
| Casein, 80 mesh                       | 200              | 800    | 200           | 800    |
| L-Cystine                             | 3                | 12     | 3             | 12     |
| Cornstarch                            | 315              | 1260   | 0             | 0      |
| Maltodextrin 10                       | 35               | 140    | 125           | 500    |
| Sucrose                               | 350              | 1400   | 68.8          | 275.2  |
| Cellulose, BW200                      | 50               | 0      | 50            | 0      |
| Soybean Oil                           | 25               | 225    | 25            | 225    |
| Lard*                                 | 20               | 180    | 245           | 2205   |
| Mineral Mix, S10026                   | 10               | 0      | 10            | 0      |
| Dicalcium Phosphate                   | 13               | 0      | 13            | 0      |
| Calcium Carbonate                     | 5.5              | 0      | 5.5           | 0      |
| Potassium Citrate, 1 H <sub>2</sub> O | 16.5             | 0      | 16.5          | 0      |
| Vitamin Mix, V10001                   | 10               | 40     | 10            | 40     |
| Choline Bitartrate                    | 2                | 0      | 2             | 0      |
| FD and C Dye                          | 0                | 0      | 0.05          | 0      |
| Total                                 | 1055.05          | 4057   | 773.85        | 4057   |

\*Estimated Lard Cholesterol: 300.8 mg/kg high-fat diet

### Supplementary Figure S1

Diet formulas.

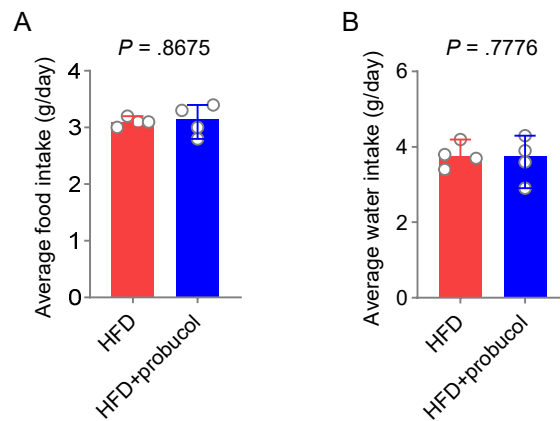

### Supplementary Figure S2

Probucol did not significantly affect the consumption of food or water by mice. **(A, B)** After 12 weeks of probucol treatment, the intake of food **(A)** and water **(B)** in HFD-fed mice was recorded for each cage. The average daily consumption of food and water per mouse was calculated and presented as individual values with median  $\pm$  95% CI (two cages and two days for each group). Two-tailed unpaired Student's *t* test was used (food,  $t = 0.1741$ ,  $p = 0.8675$ ; water,  $t = 0.2954$ ,  $p = 0.7776$ ).  $p < 0.05$  was indicative of statistical significance.

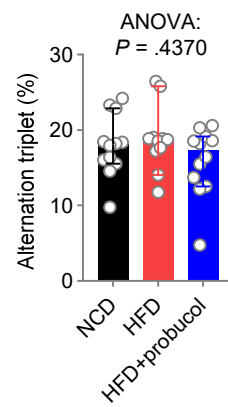

**Supplementary Figure S3**

HFD-feeding and probucol treatment did not display any discernible impact on the Y maze performance of mice.

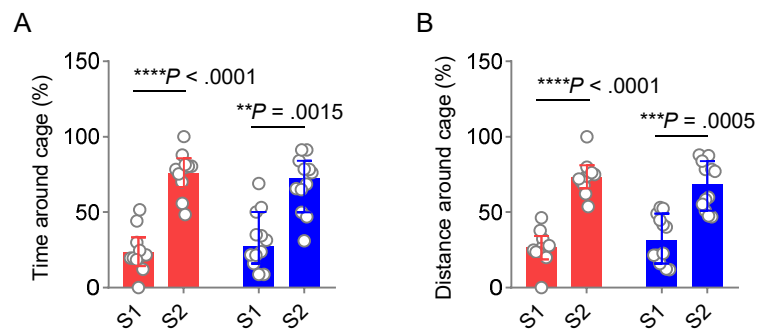

#### Supplementary Figure S4

HFD did not impair social preference of the mice for a stranger mouse over a familiar one. **(A, B)** Social preference test was performed following sociability test using the three-chamber social approach task. S1 and S2 indicate the cage with a familiar mouse introduced in the preceding social interaction phase and a new stranger mouse introduced in this social preference phase, respectively. The percentages of time spent around the cage **(A)** and the percentages of distance around the cage **(B)** are shown as individual values with median  $\pm$  95% CI ( $n = 11$  or  $12$  mice for each group). Time around cage, two-way RM ANOVA (cage,  $p < 0.0001$ ; group,  $p = 0.5034$ ), followed by Sidak's multiple comparisons test. Distance around cage, two-way RM ANOVA (cage,  $p < 0.0001$ ; group,  $p > 0.9999$ ), followed by Sidak's multiple comparisons test.  $p < 0.05$  was indicative of statistical significance.

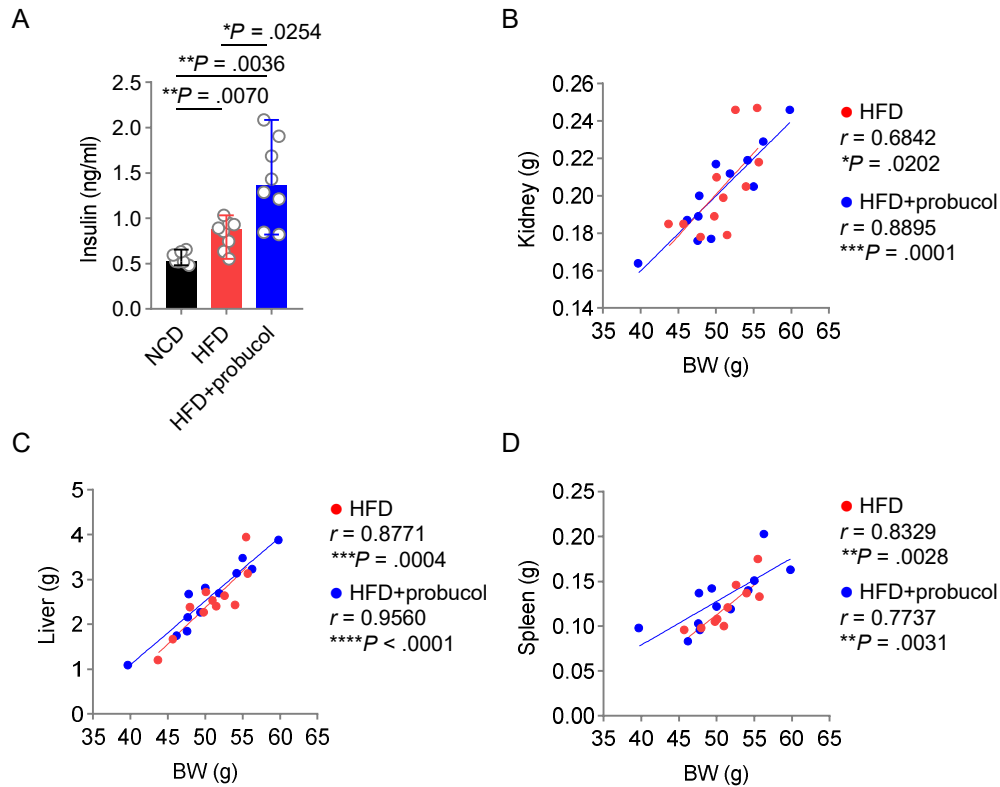

### Supplementary Figure S5

Probucol exhibited no effect on the metabolic parameters of HFD-fed mice. **(A)** Serum insulin level of mice. Blood samples of mice were collected after 6-h fasting. Data are expressed as individual values with median  $\pm$  95% CI ( $n = 7-8$  mice for each group). The difference in serum insulin level among groups was compared by Brown-Forsythe ANOVA ( $p = 0.0007$ ), followed by Tamhane's T2 multiple comparisons test. **(B-D)** The correlations between body weights and the weights of kidney, liver and spleen of the HFD-fed mice and probucol treated mice. The degree of correlations was measured by Pearson  $r$  correlation.  $p < 0.05$  was indicative of statistical significance.

Figure 5A

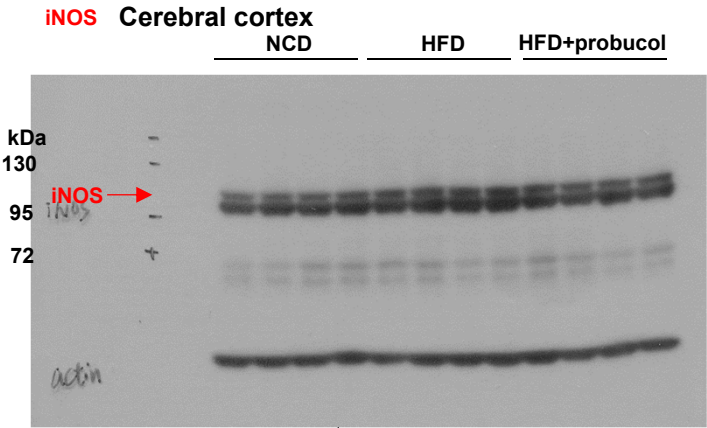

Longer exposure

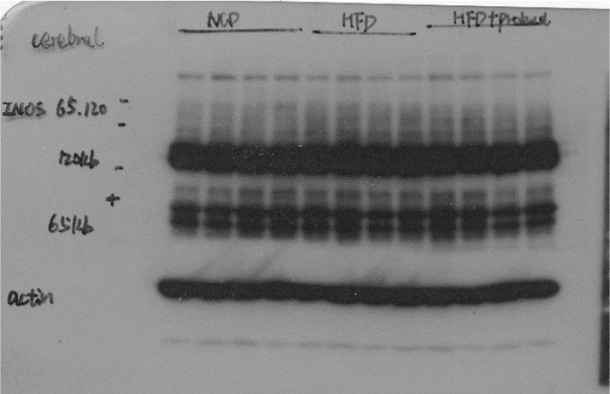

Figure 5B

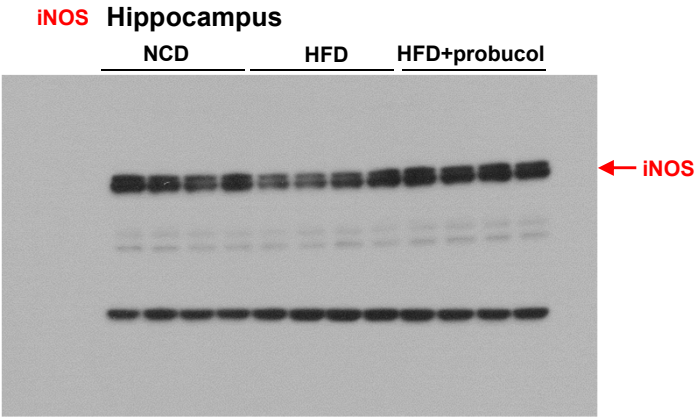

**NOX2 Hippocampus**

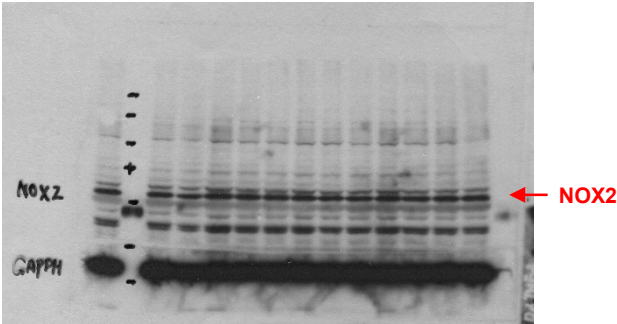

**NOX2 and GAPDH Cerebral cortex**

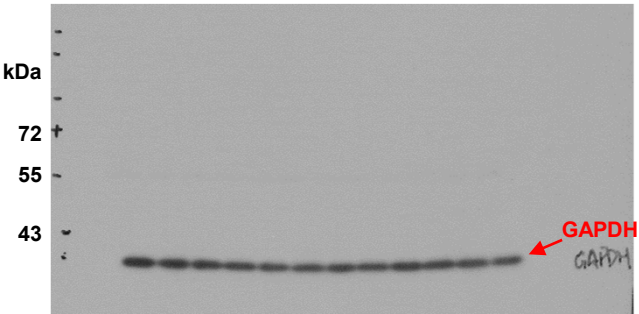

Longer exposure

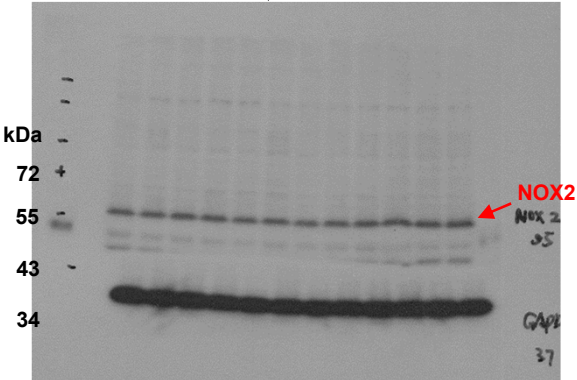

**GAPDH Hippocampus**

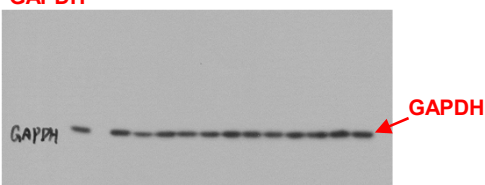

Longer exposure

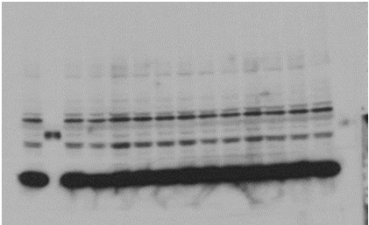

**Supplementary Figure S6**  
Raw blots for Figure 5, A and D.

**Figure 5, C and D**

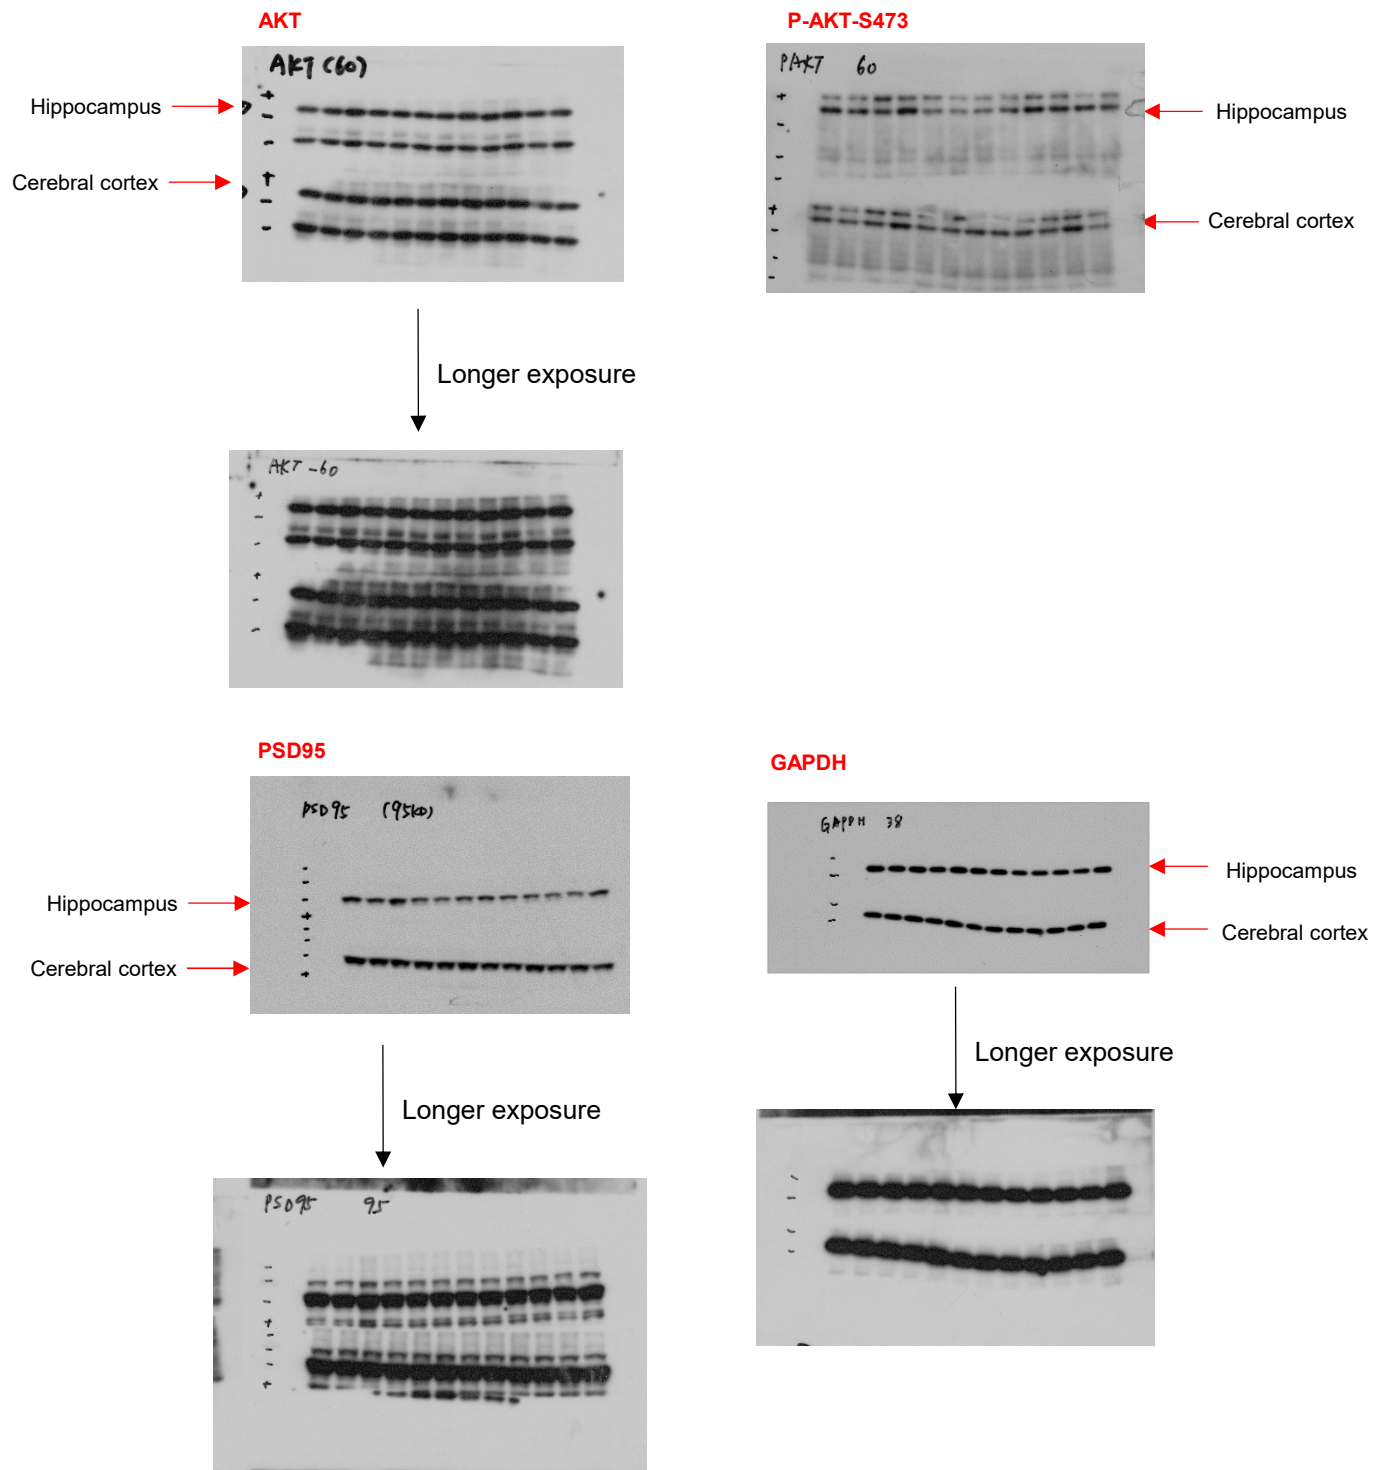

**Supplementary Figure S7**  
Raw blots for Figure 5, G and J.
